# Supplementary material
Source: publisher figshare collection journal article supplement (https://tandf.figshare.com/ndownloader/files/22364493)
Supplement: Supplementary file 1 [file 22364493]

## **Appendix A: Chinese reforms, multidimensional development, and provincial inequality**

Chinese reforms were launched in 1978, after Mao's death, by Deng Xiaoping, removing those elements of the Maoist system that reduced personal incentives, produced inefficient resource allocations within and between provinces, and hampered the potential growth of the economy (Yang, 1990; Tsui, 1993; Shue Wong 2007).<sup>1</sup> These reforms evolved over time in a gradual and pragmatic way compared to other transition economies, allowing the government to control and orientate the type of the development of the country. Deng's aim was to build a "Xiaokang society": a "moderately prosperous" society that is not exclusively concerned with economic aspects of development. Yet during the first stage of reforms, income achievements (particularly for the coastal richer provinces) were the main target of policymakers (Shue and Wong, 2007). Chinese leaders believed that the fast economic and technological development of coastal provinces would enhance also the economic development of interior provinces. Regional disparities were therefore considered as necessary for modernisation. In 1992 this concept was summarised by Deng Xiaoping with the necessity to "let some people get rich first" (Naughton 1993, p. 501).

Taxation and finance policies were decentralised, favouring the Special Economic Zones (SEZ) and the coastal provinces (Goodman and Segal, 2002). The banking system was reformed in 1984 in favour of a less centralised approach allowing different provincial interest rates. From 1979 the "Open Door" facilitated the opening of the first four Special Economic Zones, with the aim of attracting foreign direct investments (FDI) and technology to some coastal areas. These policies helped coastal areas to raise and handle capital but promoted unbalanced regional economic development too (Yang, 1990; Hansheng et al., 1996). The Coastal region (eastern provinces), besides advantages in location, human capital, infrastructure and FDI, was encouraged to develop industrial and technological capabilities, and increasing investments were planned in this direction. The centre and western regions were pushed to specialise in low technology production, raw materials, energy production and agricultural products.

---

<sup>1</sup> Despite these mistakes, China managed to achieve some significant economic results as well as some important social progress in several well-being domains. Important results involved domains such as education, health, environment (Fan et al., 2011; UNDP China, 2016).

The result of this decentralization was the emergence of inequality in the economic and social opportunities faced by individuals. Indeed, the people living in urban areas and in coastal provinces enjoyed the creation of new and better paid jobs, receiving at the same time the support of local governments in terms of health, education, and social security services. On the contrary, rural areas and western provinces experienced a much weaker growth, both in terms of economic dynamism and institutional support. The relaxation of the rules about domestic migration (the hukou system) produced large scale migration from the inner provinces and rural areas to the urban coastal areas. Top-down policies of the central government were thus a major driver of the strong regional disparities (Zhao and Tong, 2000).

From the 1990s the strategy of the central government started to change, increasingly targeting a balanced regional development through the redistribution in favour of poorest provinces.<sup>2</sup> In 1999 the Central Government launched a “Go-West strategy” campaign, followed by the “Rise of Central China Plan” in 2004 to reverse the widening economic and social divergences across China. Besides these policy efforts (which culminated in the HS project), Fang et al. (2009) suggest that a “flying gees” process of industrial development contributed to alleviate the provincial divide in the new millennium. Indeed, backward provinces benefit from transfers of capital and technology from more advanced ones, being more competitive in labour-intensive industries and “exploiting the backwardness advantages”. Both structural and political factors can therefore promote economic and social convergence across provinces.

## REFERENCES

- Fan S., Kanbur R., & Zhang X., (2011). China’s regional disparities: Experience and policy. *Review of Development Finance*, 1(1), 47–56.
- Goodman, D. S., & Segal, G. (2002). *China deconstructs: Politics, trade and regionalism*. Routledge.
- Hansheng, J., Mingtai, F., Shuzhuang, Y., & Chunping, Z. (1996). An Evaluation and Analysis of the Disequilibrium Development Strategy of China’s Regional Economy. *China’s Regional Economic Development, The Chinese University of Hong Kong press, Hong Kong*.
- Lin, J. Y. (2011). *Demystifying the Chinese economy*. Cambridge University Press.

---

<sup>2</sup> In 1994, the fiscal and financial system was revisited and partly centralised again, marking a discontinuity with the policies implemented under the Seventh Five Year Plan (1986-1990) to promote unbalanced regional economic development (Yang, 1990).

- Naughton, B. (1993). Deng Xiaoping: the economist. *The China Quarterly*, 135, 491-514.
- Shue, V., & Wong, C. (Eds.). (2007). *Paying for progress in China: Public finance, human welfare and changing patterns of inequality*. Routledge.
- Tsui, K. Y. (1993). Decomposition of China' s regional inequalities. *Journal of Comparative Economics*, 17(3), 600-627.
- UNDP China, & Development Research Center of the State Council of China (2016). *China National Human Development Report 2016: Social Innovation for Inclusive Human Development*. China Publishing Group Corporation, China Translation & Publishing House, China.
- Yang, D. (1990). Patterns of China's regional development strategy. *The China Quarterly*, 122, 230-257.
- Zhao, X. B., & Tong, S. P. (2000). Unequal economic development in China: spatial disparities and regional policy reconsideration, 1985-1995. *Regional studies*, 34(6), 549-561.

## Appendix B: The normalisation of the unidimensional provincial achievements

The normalisation technique adopted in this paper takes account of the regional difference across China and possible asymmetries across data.

In traditional normalizations, the score  $x_{pvt}$ , relative to the performance of province  $p$  in terms of variable  $v$  at time  $t$ , is transformed into the normalised variable  $z_{pvt}$  through a comparison with the value  $a$  (the lowest value achievable, i.e. the “zero”) and value  $b$  (the highest value achievable, i.e. the “one”) using the formula:

$$z_{pvt} = \frac{x_{pvt} - a_v}{b_v - a_v} \quad (I)$$

$a_v$  and  $b_v$ , can be identified with the minimum and the maximum values recorded in the sample for each  $v$ . We refined this normalization technique according to two criteria. Firstly, to improve comparability, we excluded five “outlier provinces” in the setting of the parameters  $a_v$  and  $b_v$ .<sup>3</sup> Secondly, to favour the interpretability of the aggregated scores and reduce the problem of asymmetric distributions,<sup>4</sup> we added a third parameter  $c_v$  (the average value of  $v$ ), which corresponds to 0.5. Therefore, the parameters  $a_v$ ,  $b_v$  and  $c_v$  are respectively: the minimum, highest and average values of  $x_v$  for any of the 26 comparable provinces in a given year. In order to compare the outcomes across different provinces and different years, these parameters are not year-specific nor province-specific: they only depend on the variable  $v$  considered. Equation II describes the normalization:

$$\left\{ \begin{array}{ll} z_{pvt} = 0 & \text{if } x_{pvt} < a_v \\ z_{pvt} = \frac{x_{pvt} - a_v}{2(c_v - a_v)} & \text{if } a_v \leq x_{pvt} \leq c_v \\ z_{pvt} = 0.5 + \frac{x_{pvt} - c_v}{2(b_v - c_v)} & \text{if } c_v < x_{pvt} \leq b_v \\ z_{pvt} = 1 & \text{if } x_{pvt} > b_v \end{array} \right. \quad (II)$$

<sup>3</sup> In other words,  $a_v$  and  $b_v$  are set independently of the achievements of Tibet, Beijing, Shanghai, Tianjin, Chongqing.

<sup>4</sup> If not positively addressed, aggregating asymmetrically distributed normalized variables could implicitly outweigh positively-skewed variables.

In other words, the normalization (II) improves equation (I) in a twofold way. Firstly, it allows the winsorization<sup>5</sup> of outliers in the interval  $[0; 1]$  defined by  $[a_v; b_v]$ <sup>6</sup>. Secondly, the normalization is split into two parts: lower-than-average outcomes are normalized within  $[0; 0.5]$ ; higher-than-average outcomes are normalized within  $[0.5; 1]$ .

---

<sup>5</sup> I.e. lower values were lifted to 0; higher values were decreased to 1.

<sup>6</sup> We brought to zero values lower than  $a_v$  and we brought to one the values higher than  $b_v$ . By construction, this involved only outlier provinces:  $a_v \leq x_{pvt} \leq b_v \quad \forall p \neq \text{Tibet, Beijing, Tianjin, Shanghai, Chongqing}$ .

## Appendix C: Factors that influence development (different specifications)

In order to explore the differences amongst the various specifications of development adopted, an explorative econometric analysis indicates which are the elements significantly associated with the HMI, HED and HSD indexes (i.e. considering development as overall, economic-only, and social-only domains). This analysis was carried out with random effect panel regression,<sup>7</sup> and was replicated for the period before and after the launching of the HS.

The regression considers those covariates<sup>8</sup> that can influence development: geography (two dummies distinguishes Centre and West regions; the East is the benchmark); presence of State Owned Enterprises (SOEs; measured by the share of total provincial investments made by these institutions); commerce (the sum of provincial exports and imports over GDP); investments (the ratio of investments over GDP); agriculture (the share of GDP from the primary sector); expenditure (the share of GDP managed by regional authorities). Moreover, through the variable “Trend” it is possible to observe the growth trend over time.

These covariates were chosen consistently with the literature about Chinese economic development (among the others, see Lin, 2011). Commerce and investments are traditionally considered as major engines of Chinese economic development, while SOEs, agriculture and governmental expenditure would curb growth. These results are confirmed by the regression about HED (Table D6), despite significant differences emerge looking at HSD and distinguishing before and after 2005.

This econometric analysis is only explorative: investigating the root of Chinese multidimensional development is beyond the scope of this paper, and the results (Table D6) allows only a preliminary analysis. Yet, it is important to underline the following findings:

- All the indexes grow more rapidly after 2005 (see variable “Trend”);
- Central and western provinces are significantly disadvantaged, *ceteris paribus*, before 2005. After the introduction of HS, the gap substantially reduces and is no longer significant for HMI and HSD;

---

<sup>7</sup> The suitability of this approach was tested and approved through a Hausman test.

<sup>8</sup> Importantly, all the factors that contribute to economic and social development which are already included in HMI, HED, HSD (e.g. years of education) could not be considered as covariates in the regression.

- SOEs have a significant negative impact only in HMI and HED after 2005;
- Commerce has been a strong engine before 2005; its impact is no longer significant thereafter;
- Investments and agriculture coefficients are respectively significantly positive and negative, as expected, in both periods and for all dependent variables;
- The intervention of local governments (as a share of GDP) is detrimental for most of the dependent variables, especially in the social domains.

## Appendix D: Further data analysis

**Table D1: Summary of Domains and variables (standardized values)**

|                           | 1993 |        |      | 2016 |        |      | Source                    | Notes                                                                                                       |
|---------------------------|------|--------|------|------|--------|------|---------------------------|-------------------------------------------------------------------------------------------------------------|
|                           | East | Centre | West | East | Centre | West |                           |                                                                                                             |
| Economy                   | 0.31 | 0.17   | 0.17 | 0.82 | 0.77   | 0.76 | Calculation               | Normalised Score                                                                                            |
| GDP/c                     | 0.31 | 0.15   | 0.11 | 0.90 | 0.77   | 0.73 | NBS                       | Natural logarithm of ¥ per capita; deflated with national CPI in 2000.                                      |
| Household Consumption     | 0.30 | 0.22   | 0.28 | 0.68 | 0.64   | 0.67 | NBS; Brandt & Holz (2006) | Natural logarithm of ¥; deflated with regional prices in 2000.                                              |
| Investments               | 0.31 | 0.14   | 0.11 | 0.87 | 0.88   | 0.87 | NBS                       | Natural logarithm of ¥ per capita; deflated with national CPI in 2000.                                      |
| Innovation                | 0.34 | 0.25   | 0.23 | 0.74 | 0.60   | 0.59 | Calculation               | Normalised Score                                                                                            |
| Patents                   | 0.06 | 0.02   | 0.02 | 0.75 | 0.55   | 0.55 | NBS                       | Accepted items per capita.                                                                                  |
| R&D Expenditure           | 0.46 | 0.31   | 0.25 | 0.87 | 0.74   | 0.64 | NBS; CSY                  | Natural logarithm of deflated ¥ per capita; only State-owned funds before 2000.                             |
| Technical Market          | 0.50 | 0.43   | 0.42 | 0.60 | 0.52   | 0.58 | NBS; CSY; Comp.           | Value of contractual inflows in domestic technical markets over GDP.                                        |
| Infrastructure            | 0.21 | 0.10   | 0.07 | 0.73 | 0.65   | 0.62 | Calculation               | Normalised Score                                                                                            |
| Highways                  | 0.24 | 0.17   | 0.11 | 0.78 | 0.72   | 0.55 | NBS                       | Km over Km <sup>2</sup> .                                                                                   |
| Paved Roads               | 0.43 | 0.14   | 0.10 | 0.72 | 0.67   | 0.62 | NBS; CSY                  | Coverage Rate; simple average between cities before 1995.                                                   |
| Power                     | 0.13 | 0.09   | 0.06 | 0.57 | 0.56   | 0.60 | NBS                       | Power generation (kwh) per capita.                                                                          |
| Telephone                 | 0.02 | 0.00   | 0.00 | 0.83 | 0.67   | 0.72 | NBS                       | Diffusion of fixed/mobile phone.                                                                            |
| Labour                    | 0.73 | 0.78   | 0.68 | 0.42 | 0.48   | 0.48 | Calculation               | Normalised Score                                                                                            |
| Unemployment              | 0.73 | 0.71   | 0.57 | 0.55 | 0.50   | 0.49 | NBS                       | Unemployment Rate.                                                                                          |
| Labour Share              | 0.46 | 0.65   | 0.50 | 0.45 | 0.47   | 0.52 | NBS                       | Compensation of employee over GDP.                                                                          |
| Labour Disputes           | 0.98 | 0.98   | 0.98 | 0.27 | 0.46   | 0.43 | CLY                       | Number of labour disputes cases officially accepted by a court (cases mediated in 1996–97) over population. |
| Environment               | 0.53 | 0.64   | 0.66 | 0.61 | 0.67   | 0.61 | Calculation               | Normalised Score                                                                                            |
| Sulphur Emissions         | 0.55 | 0.75   | 0.58 | 0.80 | 0.77   | 0.62 | NBS; CSY                  | Ton per capita.                                                                                             |
| Waste Water               | 0.40 | 0.56   | 0.73 | 0.25 | 0.50   | 0.51 | NBS; CSY                  | Ton per 10,000 people.                                                                                      |
| Solid Waste               | 0.80 | 0.81   | 0.86 | 0.49 | 0.47   | 0.48 | NBS; CSY                  | Ton per capita.                                                                                             |
| Environmental Emergencies | 0.37 | 0.45   | 0.45 | 0.91 | 0.92   | 0.81 | NBS; Comp.                | Events/1mln person                                                                                          |
| Urban Facilities          | 0.44 | 0.37   | 0.30 | 0.85 | 0.74   | 0.70 | Calculation               | Normalised Score                                                                                            |
| Floor                     | 0.31 | 0.16   | 0.16 | 0.84 | 0.79   | 0.74 | CSY                       | Floor per capita; residential floor sold since 2009.                                                        |



|                       |      |      |      |      |      |      |                           |                                                                                  |
|-----------------------|------|------|------|------|------|------|---------------------------|----------------------------------------------------------------------------------|
| Access to Water       | 0.78 | 0.89 | 0.45 | 0.94 | 0.78 | 0.67 | NBS; CSY                  | Coverage Rate; simple average between cities before 1995.                        |
| Access to Gas         | 0.45 | 0.34 | 0.32 | 0.96 | 0.83 | 0.73 | NBS; CSY                  | Coverage Rate; simple average between cities before 1995.                        |
| Public Buses          | 0.37 | 0.29 | 0.39 | 0.76 | 0.61 | 0.66 | NBS; CSY                  | Coverage Rate; simple average between cities before 1995.                        |
| Green Areas           | 0.29 | 0.18 | 0.17 | 0.77 | 0.67 | 0.71 | NBS; CSY                  | Coverage Rate; simple average between cities before 1995.                        |
| Health                | 0.36 | 0.31 | 0.28 | 0.83 | 0.81 | 0.86 | Calculation               | Normalised Score                                                                 |
| Hospital Beds         | 0.35 | 0.33 | 0.29 | 0.77 | 0.83 | 0.90 | NBS                       | Per 1000 People.                                                                 |
| Medical Personnel     | 0.41 | 0.36 | 0.29 | 0.82 | 0.73 | 0.77 | NBS                       | Per 1000 People.                                                                 |
| Health Expenditure    | 0.31 | 0.24 | 0.26 | 0.88 | 0.86 | 0.90 | NBS; Comp.                | Natural logarithm of deflated ¥ per capita; aggregated to education before 1996. |
| Education             | 0.27 | 0.27 | 0.24 | 0.80 | 0.75 | 0.71 | Calculation               | Normalised Score                                                                 |
| Primary Education     | 0.38 | 0.38 | 0.21 | 0.82 | 0.81 | 0.61 | NBS; CSY                  | Percentage of population with at least primary education.                        |
| Tertiary Education    | 0.13 | 0.11 | 0.19 | 0.83 | 0.69 | 0.64 | NBS; CSY                  | Percentage of population with at least tertiary education.                       |
| Student/Teacher Ratio | 0.34 | 0.46 | 0.41 | 0.66 | 0.68 | 0.71 | NBS                       | Ratio.                                                                           |
| Education Expenditure | 0.23 | 0.14 | 0.16 | 0.89 | 0.83 | 0.88 | NBS; Comp.                | Natural logarithm of deflated ¥ per capita; aggregated to health before 1996.    |
| Equity                | 0.55 | 0.55 | 0.53 | 0.72 | 0.69 | 0.68 | Calculation               | Normalised Score                                                                 |
| Urban Bias            | 0.53 | 0.52 | 0.39 | 0.81 | 0.74 | 0.67 | NBS                       | Urban household consumption over rural household consumption.                    |
| Gender Bias           | 0.35 | 0.34 | 0.37 | 0.90 | 0.82 | 0.88 | NBS; CSY                  | Differences in diffusion of tertiary education.                                  |
| Wage Bias             | 0.79 | 0.79 | 0.81 | 0.45 | 0.51 | 0.48 | NBS; CSY                  | Average wage in banking and insurance sector over average wage.                  |
| Stability             | 0.71 | 0.78 | 0.74 | 0.33 | 0.43 | 0.40 | Calculation               | Normalised Score                                                                 |
| Food Inflation        | 0.90 | 0.90 | 0.92 | 0.17 | 0.29 | 0.24 | NBS; Brandt & Holz (2006) | Regional inflation calculated with 2000 as baseline year.                        |
| Traffic Deaths        | 0.45 | 0.63 | 0.60 | 0.65 | 0.73 | 0.66 | NBS                       | Per capita.                                                                      |
| Divorces              | 0.81 | 0.79 | 0.71 | 0.26 | 0.27 | 0.34 | NBS                       | Per couple.                                                                      |
| 1-Person Household    | 0.69 | 0.81 | 0.75 | 0.26 | 0.45 | 0.35 | NBS; CSY                  | Over Total Household.                                                            |

Source: Authors' calculations. All values are weighted averages across provinces (weighted according to the population).

NBS refers to the online yearly provincial database of the National Bureau of Statistics of China; CSY refers to the yearly *China Statistical Yearbooks*; Comp. refers to the *China Compendium of Statistics*; CLY refers to the *China Labour Yearbooks*.

**Table D2: Unidimensional Domains in 1993**

| Province (1993) |        | Economy | Innovation | Infrastr. | Labour | Environ. | Urban S. | Health | Education | Equity | Stability |
|-----------------|--------|---------|------------|-----------|--------|----------|----------|--------|-----------|--------|-----------|
| Beijing         | East   | 0.58    | 0.67       | 0.24      | 0.77   | 0.57     | 0.57     | 0.81   | 0.64      | 0.80   | 0.74      |
| Shanghai        | East   | 0.63    | 0.48       | 0.27      | 0.58   | 0.36     | 0.41     | 0.77   | 0.58      | 0.79   | 0.68      |
| Tianjin         | East   | 0.52    | 0.47       | 0.22      | 0.73   | 0.54     | 0.42     | 0.68   | 0.43      | 0.69   | 0.88      |
| Fujian          | East   | 0.34    | 0.23       | 0.20      | 0.85   | 0.71     | 0.44     | 0.25   | 0.25      | 0.58   | 0.76      |
| Guangdong       | East   | 0.35    | 0.39       | 0.21      | 0.79   | 0.64     | 0.59     | 0.27   | 0.20      | 0.48   | 0.65      |
| Guangxi         | East   | 0.17    | 0.19       | 0.20      | 0.78   | 0.53     | 0.22     | 0.16   | 0.18      | 0.49   | 0.85      |
| Hainan          | East   | 0.47    | 0.24       | 0.18      | 0.68   | 0.75     | 0.57     | 0.47   | 0.22      | 0.38   | 0.80      |
| Hebei           | East   | 0.20    | 0.23       | 0.18      | 0.75   | 0.57     | 0.48     | 0.27   | 0.18      | 0.60   | 0.70      |
| Jiangsu         | East   | 0.29    | 0.32       | 0.13      | 0.68   | 0.49     | 0.42     | 0.30   | 0.32      | 0.45   | 0.76      |
| Liaoning        | East   | 0.39    | 0.38       | 0.17      | 0.67   | 0.26     | 0.45     | 0.62   | 0.39      | 0.63   | 0.71      |
| Shandong        | East   | 0.20    | 0.31       | 0.26      | 0.68   | 0.65     | 0.52     | 0.24   | 0.26      | 0.66   | 0.73      |
| Zhejiang        | East   | 0.36    | 0.29       | 0.15      | 0.64   | 0.59     | 0.36     | 0.30   | 0.23      | 0.58   | 0.62      |
| Anhui           | Centre | 0.13    | 0.15       | 0.10      | 0.82   | 0.69     | 0.40     | 0.14   | 0.22      | 0.45   | 0.79      |
| Heilongjiang    | Centre | 0.29    | 0.30       | 0.11      | 0.65   | 0.70     | 0.43     | 0.49   | 0.38      | 0.60   | 0.81      |
| Henan           | Centre | 0.07    | 0.24       | 0.10      | 0.77   | 0.78     | 0.36     | 0.18   | 0.21      | 0.58   | 0.81      |
| Hubei           | Centre | 0.19    | 0.29       | 0.10      | 0.76   | 0.64     | 0.36     | 0.39   | 0.26      | 0.48   | 0.80      |
| Hunan           | Centre | 0.14    | 0.31       | 0.09      | 0.74   | 0.57     | 0.44     | 0.21   | 0.24      | 0.55   | 0.72      |
| Inner Mongolia  | Centre | 0.30    | 0.20       | 0.09      | 0.82   | 0.58     | 0.15     | 0.44   | 0.39      | 0.63   | 0.78      |
| Jiangxi         | Centre | 0.15    | 0.18       | 0.05      | 0.90   | 0.61     | 0.39     | 0.24   | 0.26      | 0.61   | 0.86      |
| Jilin           | Centre | 0.32    | 0.31       | 0.11      | 0.85   | 0.66     | 0.35     | 0.52   | 0.37      | 0.65   | 0.72      |
| Shanxi          | Centre | 0.25    | 0.26       | 0.17      | 0.75   | 0.57     | 0.41     | 0.48   | 0.42      | 0.63   | 0.78      |
| Gansu           | West   | 0.18    | 0.26       | 0.08      | 0.68   | 0.60     | 0.32     | 0.28   | 0.22      | 0.56   | 0.88      |
| Guizhou         | West   | 0.07    | 0.13       | 0.04      | 0.77   | 0.66     | 0.48     | 0.14   | 0.16      | 0.49   | 0.84      |
| Ningxia         | West   | 0.38    | 0.23       | 0.18      | 0.61   | 0.51     | 0.32     | 0.40   | 0.32      | 0.55   | 0.79      |
| Qinghai         | West   | 0.39    | 0.18       | 0.10      | 0.80   | 0.66     | 0.35     | 0.49   | 0.29      | 0.69   | 0.77      |
| Shaanxi         | West   | 0.20    | 0.30       | 0.10      | 0.82   | 0.65     | 0.30     | 0.34   | 0.33      | 0.42   | 0.78      |
| Sichuan         | West   | 0.08    | 0.26       | 0.06      | 0.55   | 0.67     | 0.27     | 0.24   | 0.22      | 0.59   | 0.65      |
| Xinjiang        | West   | 0.38    | 0.18       | 0.05      | 0.74   | 0.74     | 0.42     | 0.45   | 0.36      | 0.66   | 0.71      |
| Yunnan          | West   | 0.19    | 0.14       | 0.05      | 0.71   | 0.70     | 0.38     | 0.27   | 0.23      | 0.47   | 0.83      |
| Chongqing       | West   | 0.21    | 0.26       | 0.07      | 0.66   | 0.74     | 0.38     | 0.24   | 0.26      | 0.52   | 0.75      |
| Tibet           | West   | 0.36    | 0.08       | 0.10      | 0.84   | 0.94     | 0.28     | 0.32   | 0.24      | 0.53   | 0.66      |

Source: Authors' calculations.

**Table D3: Unidimensional Domains in 2016**

| Province (2016) |        | Economy | Innovation | Infrastr. | Labour | Environ. | Urban S. | Health | Education | Equity | Stability |
|-----------------|--------|---------|------------|-----------|--------|----------|----------|--------|-----------|--------|-----------|
| Beijing         | East   | 0.92    | 0.97       | 0.64      | 0.50   | 0.69     | 0.87     | 0.94   | 0.96      | 0.66   | 0.26      |
| Shanghai        | East   | 0.90    | 0.88       | 0.66      | 0.24   | 0.65     | 0.80     | 0.91   | 0.93      | 0.68   | 0.37      |
| Tianjin         | East   | 0.99    | 0.95       | 0.72      | 0.26   | 0.72     | 0.87     | 0.79   | 0.94      | 0.82   | 0.43      |
| Fujian          | East   | 0.88    | 0.57       | 0.66      | 0.48   | 0.63     | 0.87     | 0.77   | 0.73      | 0.72   | 0.40      |
| Guangdong       | East   | 0.77    | 0.77       | 0.71      | 0.48   | 0.67     | 0.86     | 0.77   | 0.79      | 0.66   | 0.21      |
| Guangxi         | East   | 0.74    | 0.43       | 0.57      | 0.59   | 0.72     | 0.72     | 0.79   | 0.70      | 0.66   | 0.44      |
| Hainan          | East   | 0.85    | 0.29       | 0.66      | 0.60   | 0.77     | 0.73     | 0.80   | 0.78      | 0.64   | 0.50      |
| Hebei           | East   | 0.74    | 0.46       | 0.68      | 0.53   | 0.66     | 0.83     | 0.75   | 0.74      | 0.79   | 0.43      |
| Jiangsu         | East   | 0.89    | 0.83       | 0.83      | 0.39   | 0.58     | 0.91     | 0.85   | 0.79      | 0.74   | 0.32      |
| Liaoning        | East   | 0.73    | 0.65       | 0.63      | 0.35   | 0.56     | 0.78     | 0.87   | 0.89      | 0.75   | 0.40      |
| Shandong        | East   | 0.82    | 0.69       | 0.82      | 0.40   | 0.62     | 0.91     | 0.84   | 0.74      | 0.75   | 0.35      |
| Zhejiang        | East   | 0.88    | 0.77       | 0.76      | 0.43   | 0.64     | 0.89     | 0.89   | 0.78      | 0.75   | 0.27      |
| Anhui           | Centre | 0.75    | 0.67       | 0.72      | 0.46   | 0.72     | 0.81     | 0.71   | 0.68      | 0.67   | 0.43      |
| Heilongjiang    | Centre | 0.74    | 0.56       | 0.52      | 0.45   | 0.69     | 0.68     | 0.82   | 0.85      | 0.82   | 0.43      |
| Henan           | Centre | 0.73    | 0.46       | 0.67      | 0.56   | 0.72     | 0.65     | 0.81   | 0.67      | 0.65   | 0.46      |
| Hubei           | Centre | 0.80    | 0.74       | 0.69      | 0.53   | 0.63     | 0.79     | 0.89   | 0.77      | 0.68   | 0.34      |
| Hunan           | Centre | 0.75    | 0.53       | 0.61      | 0.48   | 0.72     | 0.74     | 0.84   | 0.73      | 0.65   | 0.47      |
| Inner Mongolia  | Centre | 0.90    | 0.39       | 0.68      | 0.39   | 0.55     | 0.83     | 0.87   | 0.88      | 0.82   | 0.48      |
| Jiangxi         | Centre | 0.76    | 0.54       | 0.62      | 0.41   | 0.67     | 0.77     | 0.73   | 0.71      | 0.65   | 0.50      |
| Jilin           | Centre | 0.82    | 0.57       | 0.59      | 0.47   | 0.71     | 0.66     | 0.83   | 0.89      | 0.77   | 0.39      |
| Shanxi          | Centre | 0.75    | 0.46       | 0.65      | 0.53   | 0.55     | 0.74     | 0.81   | 0.86      | 0.78   | 0.44      |
| Gansu           | West   | 0.73    | 0.61       | 0.54      | 0.70   | 0.68     | 0.68     | 0.78   | 0.76      | 0.73   | 0.49      |
| Guizhou         | West   | 0.73    | 0.40       | 0.63      | 0.53   | 0.62     | 0.68     | 0.85   | 0.64      | 0.60   | 0.35      |
| Ningxia         | West   | 0.91    | 0.44       | 0.77      | 0.42   | 0.46     | 0.77     | 0.87   | 0.78      | 0.76   | 0.56      |
| Qinghai         | West   | 0.90    | 0.57       | 0.51      | 0.52   | 0.41     | 0.71     | 0.90   | 0.68      | 0.78   | 0.48      |
| Shaanxi         | West   | 0.82    | 0.78       | 0.65      | 0.45   | 0.55     | 0.74     | 0.92   | 0.79      | 0.68   | 0.46      |
| Sichuan         | West   | 0.71    | 0.60       | 0.60      | 0.43   | 0.68     | 0.68     | 0.87   | 0.67      | 0.83   | 0.33      |
| Xinjiang        | West   | 0.80    | 0.37       | 0.59      | 0.63   | 0.56     | 0.80     | 0.94   | 0.85      | 0.73   | 0.46      |
| Yunnan          | West   | 0.70    | 0.44       | 0.60      | 0.57   | 0.66     | 0.66     | 0.79   | 0.68      | 0.54   | 0.43      |
| Chongqing       | West   | 0.86    | 0.66       | 0.70      | 0.31   | 0.60     | 0.80     | 0.87   | 0.78      | 0.57   | 0.39      |
| Tibet           | West   | 0.87    | 0.11       | 0.45      | 0.82   | 0.84     | 0.39     | 0.75   | 0.57      | 0.52   | 0.57      |

Source: Authors' calculations.

**Table D4: Multidimensional Index in 1993, 2005 and 2016**

|               | 1993        |      |      | 2005        |      |      | 2016        |      |      |
|---------------|-------------|------|------|-------------|------|------|-------------|------|------|
|               | HMI         | HED  | HSD  | HMI         | HED  | HSD  | HMI         | HED  | HSD  |
| Beijing       | <b>0.62</b> | 0.54 | 0.71 | <b>0.66</b> | 0.63 | 0.69 | <b>0.71</b> | 0.72 | 0.70 |
| Shanghai      | <b>0.53</b> | 0.45 | 0.63 | <b>0.61</b> | 0.53 | 0.69 | <b>0.67</b> | 0.63 | 0.71 |
| Tianjin       | <b>0.53</b> | 0.47 | 0.60 | <b>0.61</b> | 0.55 | 0.67 | <b>0.72</b> | 0.68 | 0.75 |
| Fujian        | <b>0.40</b> | 0.40 | 0.41 | <b>0.48</b> | 0.48 | 0.48 | <b>0.66</b> | 0.63 | 0.68 |
| Guangdong     | <b>0.42</b> | 0.43 | 0.40 | <b>0.51</b> | 0.55 | 0.47 | <b>0.64</b> | 0.67 | 0.62 |
| Guangxi       | <b>0.31</b> | 0.31 | 0.30 | <b>0.40</b> | 0.36 | 0.44 | <b>0.62</b> | 0.60 | 0.65 |
| Hainan        | <b>0.43</b> | 0.41 | 0.45 | <b>0.46</b> | 0.44 | 0.48 | <b>0.65</b> | 0.61 | 0.68 |
| Hebei         | <b>0.36</b> | 0.33 | 0.40 | <b>0.49</b> | 0.43 | 0.55 | <b>0.65</b> | 0.61 | 0.69 |
| Jiangsu       | <b>0.38</b> | 0.34 | 0.42 | <b>0.51</b> | 0.51 | 0.51 | <b>0.69</b> | 0.68 | 0.69 |
| Liaoning      | <b>0.44</b> | 0.34 | 0.55 | <b>0.54</b> | 0.49 | 0.58 | <b>0.64</b> | 0.57 | 0.72 |
| Shandong      | <b>0.40</b> | 0.37 | 0.44 | <b>0.47</b> | 0.49 | 0.45 | <b>0.67</b> | 0.65 | 0.69 |
| Zhejiang      | <b>0.38</b> | 0.37 | 0.39 | <b>0.51</b> | 0.51 | 0.52 | <b>0.68</b> | 0.68 | 0.68 |
| East          | <b>0.31</b> | 0.38 | 0.44 | <b>0.51</b> | 0.51 | 0.51 | <b>0.67</b> | 0.65 | 0.68 |
| Anhui         | <b>0.41</b> | 0.27 | 0.34 | <b>0.41</b> | 0.43 | 0.40 | <b>0.65</b> | 0.66 | 0.65 |
| Heilongjiang  | <b>0.43</b> | 0.35 | 0.52 | <b>0.47</b> | 0.41 | 0.53 | <b>0.64</b> | 0.58 | 0.70 |
| Henan         | <b>0.33</b> | 0.28 | 0.37 | <b>0.44</b> | 0.43 | 0.46 | <b>0.63</b> | 0.62 | 0.64 |
| Hubei         | <b>0.37</b> | 0.32 | 0.42 | <b>0.47</b> | 0.47 | 0.47 | <b>0.67</b> | 0.67 | 0.67 |
| Hunan         | <b>0.34</b> | 0.29 | 0.39 | <b>0.45</b> | 0.43 | 0.47 | <b>0.64</b> | 0.61 | 0.68 |
| Inn. Mongolia | <b>0.37</b> | 0.32 | 0.43 | <b>0.48</b> | 0.43 | 0.54 | <b>0.65</b> | 0.55 | 0.76 |
| Jiangxi       | <b>0.34</b> | 0.27 | 0.42 | <b>0.42</b> | 0.41 | 0.44 | <b>0.63</b> | 0.59 | 0.66 |
| Jilin         | <b>0.44</b> | 0.38 | 0.50 | <b>0.50</b> | 0.44 | 0.56 | <b>0.65</b> | 0.62 | 0.69 |
| Shanxi        | <b>0.43</b> | 0.35 | 0.52 | <b>0.48</b> | 0.42 | 0.54 | <b>0.64</b> | 0.58 | 0.71 |
| Centre        | <b>0.36</b> | 0.31 | 0.42 | <b>0.45</b> | 0.43 | 0.47 | <b>0.65</b> | 0.63 | 0.67 |
| Gansu         | <b>0.34</b> | 0.29 | 0.40 | <b>0.43</b> | 0.43 | 0.44 | <b>0.66</b> | 0.65 | 0.68 |
| Guizhou       | <b>0.28</b> | 0.22 | 0.35 | <b>0.35</b> | 0.34 | 0.35 | <b>0.59</b> | 0.57 | 0.60 |
| Ningxia       | <b>0.39</b> | 0.35 | 0.45 | <b>0.44</b> | 0.41 | 0.47 | <b>0.65</b> | 0.57 | 0.74 |
| Qinghai       | <b>0.42</b> | 0.35 | 0.49 | <b>0.49</b> | 0.43 | 0.56 | <b>0.62</b> | 0.56 | 0.70 |
| Shaanxi       | <b>0.37</b> | 0.33 | 0.40 | <b>0.45</b> | 0.43 | 0.48 | <b>0.67</b> | 0.63 | 0.70 |
| Sichuan       | <b>0.30</b> | 0.25 | 0.36 | <b>0.41</b> | 0.38 | 0.43 | <b>0.62</b> | 0.59 | 0.65 |
| Xinjiang      | <b>0.42</b> | 0.33 | 0.50 | <b>0.51</b> | 0.44 | 0.59 | <b>0.65</b> | 0.57 | 0.74 |
| Yunnan        | <b>0.32</b> | 0.26 | 0.39 | <b>0.43</b> | 0.40 | 0.46 | <b>0.60</b> | 0.59 | 0.61 |
| Chongqing     | <b>0.35</b> | 0.31 | 0.39 | <b>0.42</b> | 0.46 | 0.38 | <b>0.63</b> | 0.60 | 0.66 |
| Tibet         | <b>0.35</b> | 0.34 | 0.38 | <b>0.38</b> | 0.37 | 0.39 | <b>0.55</b> | 0.55 | 0.55 |
| West          | <b>0.33</b> | 0.28 | 0.38 | <b>0.42</b> | 0.41 | 0.44 | <b>0.63</b> | 0.61 | 0.65 |

Source: Authors' calculations.

**Table D5: HMI and Sub-Indexes, Correlation Matrix**

| Correlations | SD      | IS      | ED      | ES      | HED    | HSD    | HMI    |
|--------------|---------|---------|---------|---------|--------|--------|--------|
| SD           | 1.0000  |         |         |         |        |        |        |
| IS           | -0.3770 | 1.0000  |         |         |        |        |        |
| ED           | 0.9191  | -0.4772 | 1.0000  |         |        |        |        |
| ES           | -0.6228 | 0.2733  | -0.7358 | 1.0000  |        |        |        |
| HED          | 0.9045  | -0.4872 | 0.9536  | -0.5371 | 1.0000 |        |        |
| HSD          | 0.9705  | -0.1577 | 0.8579  | -0.5988 | 0.8479 | 1.0000 |        |
| HMI          | 0.9749  | -0.3370 | 0.9433  | -0.5903 | 0.9621 | 0.9602 | 1.0000 |

Source: Authors' calculations.

Note: All the results are significant at 0.01 level. IS and ES are significantly positively correlated with each other and negatively correlated with all the remaining indexes. This result confirms the lack of full synergy across sub-indexes, as described in the subsection "Results and Discussion - Synergies of different provincial development patterns". A wider correlation matrix (not reported for space concerns), containing the 10 domains and the 36 proxies confirms that, with few exceptions, the elements grouped together are significantly positively correlated.

**Table D6: Factors that influence HMI, HED and HSD before and after 2005**

|              | (1)<br>HMI<br>Before  | (2)<br>HED<br>Before  | (3)<br>HSD<br>Before | (4)<br>HMI<br>After  | (5)<br>HED<br>After   | (6)<br>HSD<br>After  |
|--------------|-----------------------|-----------------------|----------------------|----------------------|-----------------------|----------------------|
| Trend        | 0.00678***<br>(17.11) | 0.00813***<br>(19.35) | 0.00505***<br>(8.37) | 0.0110***<br>(18.30) | 0.0100***<br>(16.70)  | 0.0122***<br>(13.85) |
| Centre       | -0.0428*<br>(-2.47)   | -0.0495**<br>(-3.18)  | -0.0343<br>(-1.40)   | -0.0125<br>(-0.86)   | -0.0317*<br>(-2.08)   | 0.0108<br>(0.44)     |
| West         | -0.0554**<br>(-3.16)  | -0.0669***<br>(-4.20) | -0.0430<br>(-1.72)   | -0.0232<br>(-1.54)   | -0.0394*<br>(-2.51)   | -0.00362<br>(-0.15)  |
| SOEs         | 0.0000210<br>(1.14)   | -0.0000138<br>(-0.70) | 0.0000545<br>(1.93)  | -0.0569*<br>(-2.45)  | -0.0957***<br>(-4.13) | -0.0184<br>(-0.54)   |
| Commerce     | 0.249***<br>(4.11)    | 0.255***<br>(3.97)    | 0.252**<br>(2.73)    | 0.0851<br>(1.01)     | -0.0311<br>(-0.37)    | 0.245<br>(1.96)      |
| Investments  | 0.0143<br>(0.96)      | 0.0640***<br>(4.02)   | -0.0393<br>(-1.73)   | 0.0760***<br>(8.35)  | 0.0641***<br>(7.06)   | 0.0876***<br>(6.61)  |
| Agriculture  | -0.161***<br>(-3.94)  | -0.165***<br>(-3.91)  | -0.188**<br>(-3.05)  | -0.460***<br>(-6.83) | -0.413***<br>(-6.06)  | -0.487***<br>(-4.78) |
| Expenditure  | -0.0723*<br>(-2.27)   | -0.0227<br>(-0.68)    | -0.112*<br>(-2.32)   | -0.0551**<br>(-2.79) | -0.0211<br>(-1.06)    | -0.0871**<br>(-2.96) |
| Constant     | 0.442***<br>(28.16)   | 0.375***<br>(24.64)   | 0.517***<br>(22.55)  | 0.415***<br>(19.93)  | 0.422***<br>(20.02)   | 0.399***<br>(12.62)  |
| Observations | 403                   | 403                   | 403                  | 372                  | 372                   | 372                  |

*t* statistics in parentheses

\*  $p < 0.05$ , \*\*  $p < 0.01$ , \*\*\*  $p < 0.001$

Source: Authors' calculations.

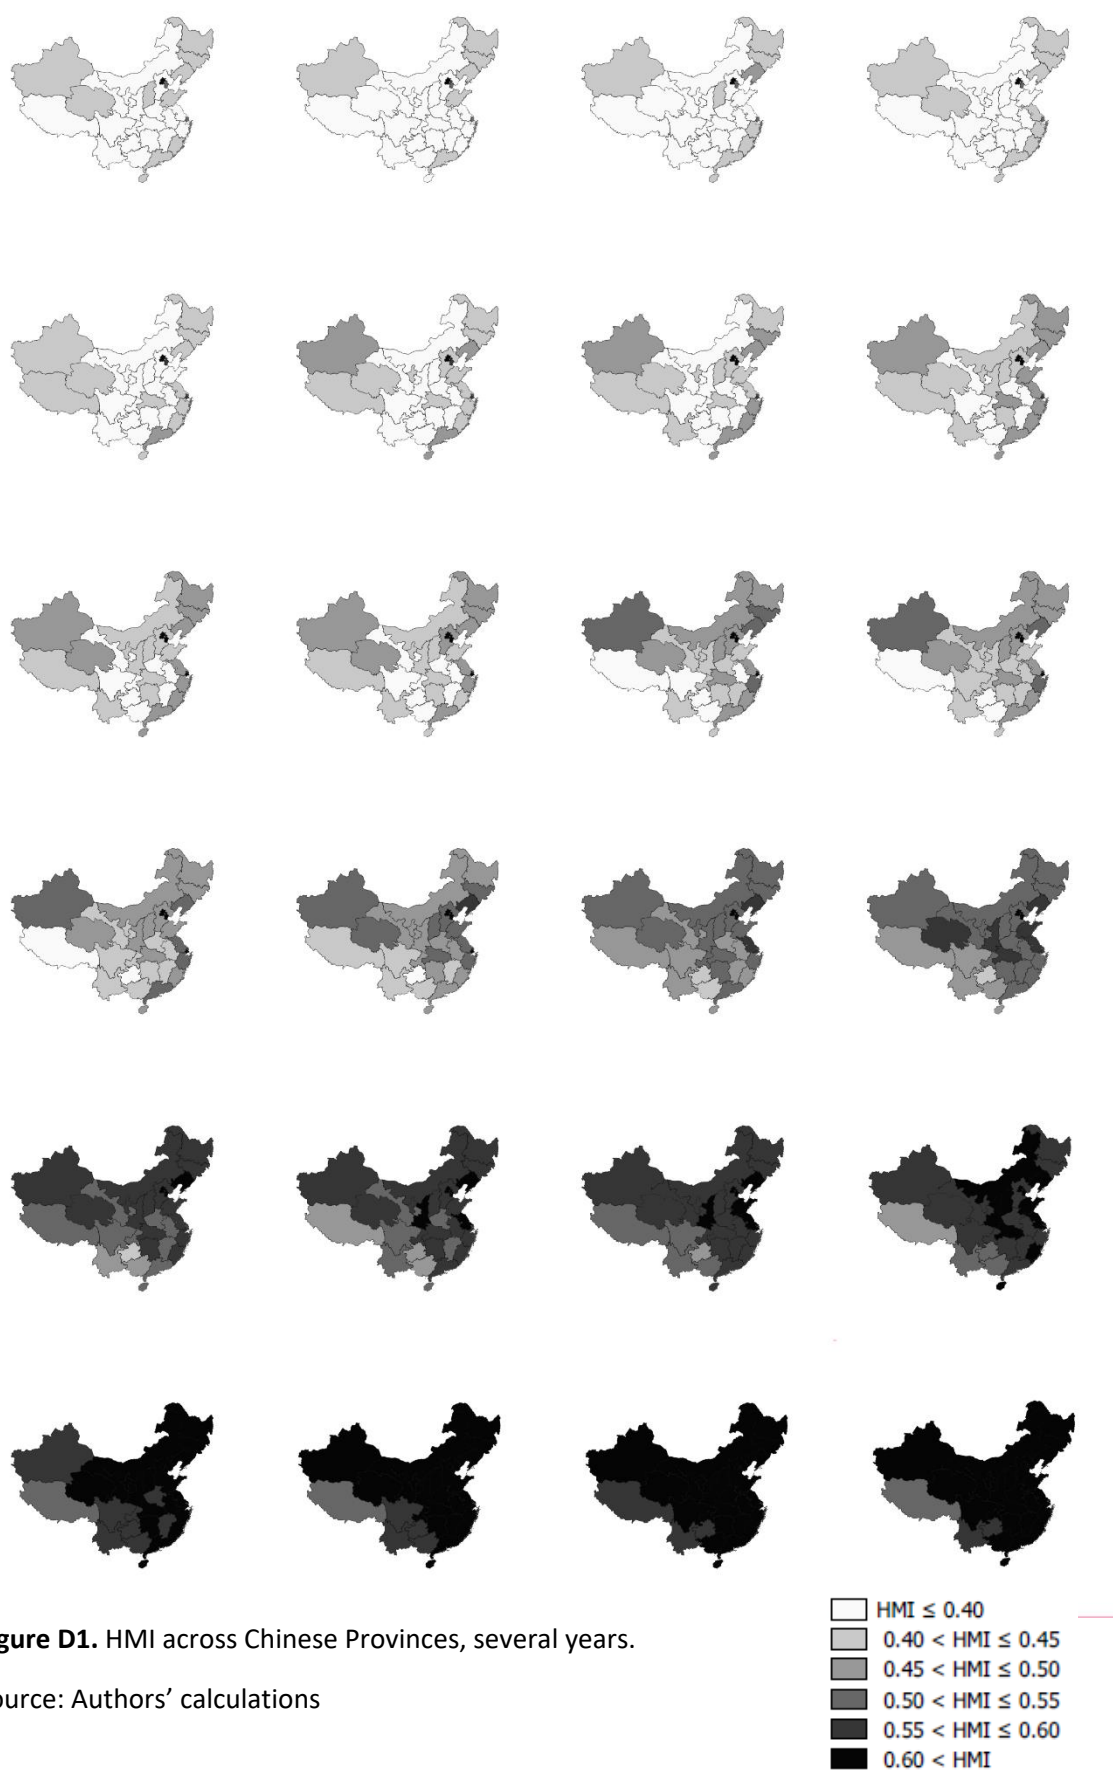

**Figure D1.** HMI across Chinese Provinces, several years.

Source: Authors' calculations
